# Supplementary material for: Caution, Student Experience May Vary: Social Identities Impact a Student’s Experience in Peer Discussions
Source: Atypon-hosted journal article supplement (doi:10.1187/cbe.15-05-0108), 2015-12-01
Supplement: combinedsupmats.pdf [file combinedsupmats.pdf]

# Supplemental Material

*CBE—Life Sciences Education*

Eddy *et al.*

Supplementary Materials:

**A. The Classes and Student Population: Supplemental Table**

**Suppl Table 1.** Pearson’s correlation coefficients between Total Exam Points Earned and other measures of student competency.

|                              | Term A | Term B | Term C |
|------------------------------|--------|--------|--------|
| Exam 1                       | 0.80   | 0.85   | 0.81   |
| Exam 2                       | 0.86   | 0.87   | 0.81   |
| Exam 3                       | 0.89   | 0.81   | 0.81   |
| Exam 4                       | 0.84   | 0.78   | 0.83   |
| Cumulative College GPA       | NA     | 0.73   | 0.72   |
| Grade in Prior Biology Class | NA     | 0.73   | 0.79   |

**B. Study 1 Supplemental Tables: What roles do students prefer to play in peer discussions?**

A combination of grounded theory and content analysis was used to code students’ open-ended responses to the question “What role do you prefer to play in peer discussions?” (Glaser and Strauss, 2009; Strauss and Corbin, 1990). We identified four categories: leader, collaborator, listener, and recorder and sample quotes for each of these is in Suppl Table 1. Two independent reviewers coded the responses and came to consensus when they disagreed.

**Suppl Table 2.** Themes identified from the open-ended question ‘What role do you prefer to play in peer discussions?’”

| Theme        | Percentage | Sample quotes                                                                                                           |                                                                                                                                                                                                      |
|--------------|------------|-------------------------------------------------------------------------------------------------------------------------|------------------------------------------------------------------------------------------------------------------------------------------------------------------------------------------------------|
| Collaborator | 44.1%      | I like being able to help explain answers and I also enjoy learning from others                                         | Listening and contributing                                                                                                                                                                           |
| Leader       | 27.2% %    | Generally, in most situations I obtain the role of the leader, but this is dependent upon my knowledge of the material. | Ruler. (Just kidding, an all round role I would say, asking questions about things I am not sure of, explaining my reasoning on things and asking others besides my group on why they put an answer) |
| Listener     | 11.1%      | listening                                                                                                               | to listen to others'                                                                                                                                                                                 |

|          |      |                                                                                        |        |
|----------|------|----------------------------------------------------------------------------------------|--------|
|          |      |                                                                                        | input  |
| Recorder | 5.0% | Working on worksheets in class, I learn best if I am in charge of writing the answers. | writer |

**Suppl Table 3.** Preferred Roles in Groupwork. 95% confidence set of best ranked models (summed  $\omega > 0.95$ ) examining the effect of student characteristics on the roles they play in peer discussions. Friend = Friend in Group (Y/N); Ethn = Race/Ethnicity/Nationality; RBC = Relative Biology Competency

| Rank | Model                                  | AICc   | $\Delta_i$ | $\omega_i$ |
|------|----------------------------------------|--------|------------|------------|
| 1    | Gender + Friend + Ethn                 | 798.32 | 0          | 0.29       |
| 2    | Gender + Friend                        | 798.82 | 0.50       | 0.22       |
| 3    | Gender + Ethn                          | 799.91 | 1.59       | 0.13       |
| 4    | Gender + Friend + RBC                  | 800.57 | 2.25       | 0.09       |
| 5    | Gender                                 | 801.27 | 2.95       | 0.07       |
| 6    | Gender + Friend + Ethn + RBC           | 802.64 | 4.32       | 0.03       |
| 7    | Gender + RBC                           | 802.71 | 4.39       | 0.03       |
| 8    | Gender + Friend + Ethn + Gender*Friend | 802.83 | 4.51       | 0.03       |
| 9    | Gender + Friend + Gender*Friend        | 803.25 | 4.93       | 0.02       |
| 10   | Gender + Ethn+ RBC                     | 803.75 | 5.43       | 0.02       |
| 11   | Gender + Friend + Ethn + Gender*Ethn   | 804.02 | 5.43       | 0.02       |

**Suppl Table 4.** Model-averaged multinomial regression coefficients Note: The reference level is always listed first in the comparison. A negative number indicates the student is more likely to prefer the role that is the reference level. A positive number indicates the student is more likely to prefer the role that is the comparison. \*\*\*\*  $p \leq 0.0001$ , \*\*\*  $p \leq 0.001$ , \*\*  $p \leq 0.01$ , \*  $p \leq 0.05$ , <sup>†</sup>  $p \leq 0.01$

| Comparison s:             | Intercept<br>$\beta \pm SE$<br>(p-value) | Gender:<br>Female<br>(ref: Male)<br>$\beta \pm SE$<br>(p-value) | Friend in<br>Group:Yes<br>(ref: No)<br>$\beta \pm SE$<br>(p-value) | Race/Ethnicity/Nationality:                                  |                                                                       |                                                                     | Relative<br>Biology<br>Competency<br>$\beta \pm SE$<br>(p-value) | Term<br>$\beta \pm SE$<br>(p-value)  |
|---------------------------|------------------------------------------|-----------------------------------------------------------------|--------------------------------------------------------------------|--------------------------------------------------------------|-----------------------------------------------------------------------|---------------------------------------------------------------------|------------------------------------------------------------------|--------------------------------------|
|                           |                                          |                                                                 |                                                                    | Ethn:<br>Asian<br>(ref:White)<br>$\beta \pm SE$<br>(p-value) | Ethn:<br>International<br>(ref: White)<br>$\beta \pm SE$<br>(p-value) | Ethn:<br>Underserved<br>(ref: White)<br>$\beta \pm SE$<br>(p-value) |                                                                  |                                      |
| Leader vs. Listener       | -1.73±0.765<br>(0.023)*                  | 1.27±0.460<br>(0.005)**                                         | -0.82±0.461<br>(0.076) <sup>†</sup>                                | 1.20±0.579<br>(0.037)*                                       | 2.01±0.800<br>(0.012)*                                                | 1.52±0.806<br>(0.060) <sup>†</sup>                                  | -0.49±0.22<br>(0.0270)*                                          | 0.44±0.47<br>(0.337)                 |
| Leader vs. Collaborator   | -0.28±0.337<br>(0.401)                   | 1.37±0.301<br>(0.0001)****                                      | 0.09±0.349<br>(0.800)                                              | 0.07±0.317<br>(0.817)                                        | -0.52±0.698<br>(0.460)                                                | -0.63±0.625<br>(0.309)                                              | -0.14±0.158<br>(0.352)                                           | 0.08±0.340<br>(0.821)                |
| Leader vs. Recorder       | -3.24±0.933<br>(0.003)**                 | 2.42±0.799<br>(0.0025)**                                        | 0.41±0.723<br>(0.571)                                              | -0.94±0.668<br>(0.159)                                       | -13.31±362.829<br>(0.971)                                             | -0.24±0.934<br>(0.801)                                              | 0.18±0.321<br>(0.570)                                            | -1.5±1.08<br>(0.162)                 |
| Collaborator vs. Listener | -1.45±0.773<br>(0.061) <sup>†</sup>      | -0.07 ± 0.439<br>(0.858)                                        | -0.91 ± 0.424<br>(0.0322)*                                         | 1.13 ± 0.553<br>(0.041)*                                     | 2.53 ± 0.774<br>(0.0011)**                                            | 2.15 ± 0.767<br>(0.005)**                                           | -0.35±0.203<br>(0.088) <sup>†</sup>                              | 0.37±0.426<br>(0.3857)               |
| Collaborator vs. Recorder | -2.96 ± 0.918<br>(0.0013)**              | 1.04 ± 0.788<br>(0.184)                                         | 0.32 ± 0.692<br>(0.643)                                            | -1.01 ± 0.637<br>(0.111)                                     | -12.8 ± 658.137<br>(0.984)                                            | 0.40 ± 0.889<br>(0.653)                                             | 0.33±0.305<br>(0.280)                                            | -1.59±1.06<br>(0.135)                |
| Listener vs. Recorder     | -1.51 ± 1.27<br>(0.233)                  | 1.12 ± 0.864<br>(0.192)                                         | 1.23 ± 0.766<br>(0.109)                                            | -2.15 ± 0.807<br>(0.0078)**                                  | -14.8 ± 493.706<br>(0.976)                                            | -1.8 ± 1.03<br>(0.090) <sup>†</sup>                                 | 0.68±0.347<br>(0.0512) <sup>†</sup>                              | -1.96±1.111<br>(0.078) <sup>†</sup>  |
| Leader vs. Other          | -0.58 ± 0.515<br>(0.256)                 | 0.85 ± 0.416<br>(0.039)*                                        | -0.92 ± 0.432<br>(0.032)*                                          | -0.72 ± 0.452<br>(0.112)                                     | -1.27 ± 1.141<br>(0.265)                                              | -0.37 ± 0.452<br>(0.113)                                            | -0.04±0.219<br>(0.861)                                           | 0.18±0.459<br>(0.702)                |
| Collaborator vs. Other    | 0.30 ± 0.523<br>(0.564)                  | -0.52 ± 0.396<br>(0.194)                                        | -1.01 ± 0.398<br>(0.011)*                                          | -0.79 ± 0.424<br>(0.063) <sup>†</sup>                        | -0.76± 1.134<br>(0.5043)                                              | 0.26 ± 0.752<br>(0.728)                                             | 0.12±0.203<br>(0.280)                                            | 0.10±0.427<br>(0.8165)               |
| Listener vs. Other        | 1.15 ± 0.857<br>(0.181)                  | -0.44 ± 0.522<br>(0.403)                                        | -0.11 ± 0.507<br>(0.835)                                           | -1.92 ± 0.634<br>(0.024)*                                    | -3.28 ± 1.192<br>(0.0059)**                                           | -1.89 ± 0.894<br>(0.0344)*                                          | 0.455±0.465<br>(0.338)                                           | -0.27±0.526<br>(0.0607) <sup>†</sup> |
| Recorder vs. Other        | 2.66 ± 1.02<br>(0.009)**                 | -1.56 ± 0.838<br>(0.062) <sup>†</sup>                           | -0.95 ± 0.869<br>(0.276)                                           | 0.11 ± 0.530<br>(0.829)                                      | 5.85 ± 5.793<br>(0.312)                                               | -0.071 ± 0.733<br>(0.923)                                           | -0.045±0.178<br>(0.802)                                          | 0.16±0.603<br>(0.789)                |

|                              |    |   |      |      |      |      |
|------------------------------|----|---|------|------|------|------|
| Relative Variable Importance | NA | 1 | 0.71 | 0.51 | 0.20 | 0.10 |
|------------------------------|----|---|------|------|------|------|

**C. Study 2 Supplemental Tables: Do students indicate that groupmates limit the ability of others to participate in peer discussions?**

1. Codes from student responses to “What is the worst part of groupwork?”

**Suppl. Table 5.** Themes identified from the open-ended question ‘What is the worst part of groupwork?’

| Theme                                                        | Percentage | Sample quotes                                                                                                                        |                                                                                                                                                                                                                                                                                                                                                                                                           |
|--------------------------------------------------------------|------------|--------------------------------------------------------------------------------------------------------------------------------------|-----------------------------------------------------------------------------------------------------------------------------------------------------------------------------------------------------------------------------------------------------------------------------------------------------------------------------------------------------------------------------------------------------------|
| Lack of knowledge                                            | 24.1%      | No one has an idea about what we're learning.                                                                                        | Very confusing questions that no one knows how to tackle.                                                                                                                                                                                                                                                                                                                                                 |
| Groupmates limiting participation of other groupmates        | 12.5%      | sometime some of the members can be dominating                                                                                       | Just the fact that sometimes since we are on a time crunch, not everyone gets to share their ideas. Also, some people have more influence when they share their ideas that others for some reason.                                                                                                                                                                                                        |
| Groupmate Deficit – blaming groupmates for not participating | 12.6%      | Some people haven't done the reading and try to back up an answer that makes absolutely no sense and do not provide any new insight. | It annoys when me someone is being shy. International students tend to be shy and withdrawn, or only want to interact with other international students. I don't think it's even a language barrier, I think a lot of the Asian students come from a culture where they're not socialized to be as loud and outgoing as we are in America, so they don't want to share their ideas even when they're very |

|                             |       |                                                                                                                 |                                                                                                                                       |
|-----------------------------|-------|-----------------------------------------------------------------------------------------------------------------|---------------------------------------------------------------------------------------------------------------------------------------|
|                             |       |                                                                                                                 | smart.                                                                                                                                |
| Conflicting ideas           | 9.9%  | When every single member believes the answer is different from the other, and the explanations sound plausible. | too many opinions sometimes                                                                                                           |
| Uncomfortable participating | 7.1%  | i get intimidating when someone ask question that I dont have answers for.                                      | Not being able to contribute when I don't understand the material, not knowing if my group and I are correct/have the correct answers |
| Other                       | 33.8% |                                                                                                                 |                                                                                                                                       |

2. Model Selection Results for whether or not a student reports a groupmate limiting participation.

**Suppl. Table 6.** 95% confidence set of best ranked models (summed  $\omega_i > 0.95$ ) examining the effect of student level characteristics on whether a student reported a groupmate limiting other's participation as the worst part of groupwork.

| Rank | Model                                   | AICc   | $\Delta_i$ | $\omega_i$ |
|------|-----------------------------------------|--------|------------|------------|
| 1    | RBC                                     | 209.63 | 0.0        | 0.17       |
| 2    | RBC + Gender                            | 210.03 | 0.40       | 0.14       |
| 3    | RBC + Term                              | 211.23 | 1.60       | 0.08       |
| 4    | RBC + Friend                            | 211.60 | 1.97       | 0.06       |
| 5    | RBC + Gender + Term                     | 211.74 | 2.11       | 0.06       |
| 6    | RBC + Gender + Friend                   | 212.05 | 2.42       | 0.05       |
| 7    | Gender                                  | 212.19 | 2.56       | 0.05       |
| 8    | (NULL Model)                            | 212.47 | 2.84       | 0.04       |
| 9    | RBC + Ethn                              | 212.79 | 3.17       | 0.03       |
| 10   | RBC + Friend + Term                     | 213.26 | 3.63       | 0.03       |
| 11   | RBC + Gender + Ethn                     | 213.44 | 3.81       | 0.02       |
| 12   | RBC + Gender + Friend + Term            | 213.80 | 4.17       | 0.02       |
| 13   | RBC + Gender + Friend + Gender x Friend | 213.84 | 4.22       | 0.02       |
| 14   | Gender + Term                           | 213.93 | 4.30       | 0.02       |
| 15   | Term                                    | 214.17 | 4.54       | 0.02       |
| 16   | Gender + Friend                         | 214.17 | 4.54       | 0.02       |
| 17   | RBC + Ethn + Term                       | 214.38 | 4.76       | 0.02       |
| 18   | Friend                                  | 214.40 | 4.77       | 0.02       |
| 19   | RBC + Friend + Ethn                     | 214.55 | 4.92       | 0.01       |
| 20   | Ethn                                    | 214.68 | 5.06       | 0.01       |
| 21   | Gender + Ethn                           | 214.76 | 5.14       | 0.01       |
| 22   | RBC + Gender + Ethn + Term              | 215.17 | 5.54       | 0.01       |
| 23   | RBC + Gender + Friend + Ethn            | 215.29 | 5.66       | 0.01       |

|    |                                                |        |      |      |
|----|------------------------------------------------|--------|------|------|
| 24 | RBC + Gender + Friend + Term + Gender x Friend | 215.58 | 5.95 | 0.01 |
| 25 | Gender + Friend + Term                         | 215.96 | 6.34 | 0.01 |
| 26 | Gender + Friend + Gender x Friend              | 216.04 | 6.42 | 0.01 |
| 27 | Friend + Term                                  | 216.16 | 6.53 | 0.01 |

3. Model selection results for Likert Scale ‘Dominator in Group’ Question.

**Suppl. Table 7.** 95% confidence set of best ranked models (summed  $\omega_i > 0.95$ ) examining the effect of student level characteristics on whether a student reports a dominator in their group.

| Rank | Model                                                 | AICc   | $\Delta_i$ | $\omega_i$ |
|------|-------------------------------------------------------|--------|------------|------------|
| 1    | RBC + Ethn + Term                                     | 593.17 | 0.0        | 0.39       |
| 2    | RBC + Ethn + Term + Friend                            | 594.40 | 1.23       | 0.21       |
| 3    | RBC + Ethn + Term + Gender                            | 595.03 | 1.86       | 0.16       |
| 4    | RBC + Ethn + Term + Friend + Gender                   | 596.31 | 3.14       | 0.08       |
| 5    | RBC + Ethn + Term + Friend + Gender + Gender x Friend | 598.42 | 5.25       | 0.03       |
| 6    | RBC + Ethn + Term + Friend + Ethn x Friend            | 599.44 | 6.27       | 0.02       |
| 7    | RBC + Ethn + Term + Gender + Gender x Ethn            | 599.73 | 6.56       | 0.01       |
| 8    | RBC + Term                                            | 599.76 | 6.59       | 0.01       |
| 9    | RBC + Ethn                                            | 599.89 | 6.72       | 0.01       |
| 10   | RBC + Ethn + Friend                                   | 600.02 | 6.85       | 0.01       |
| 11   | RBC + Term + Friend                                   | 600.84 | 7.67       | 0.01       |
| 12   | RBC + Ethn + Term + Friend + Gender + Ethn x Friend   | 601.26 | 8.09       | 0.01       |

**Suppl. Table 8.** Model averaged coefficients for whether a student reports Lack of Access issues in their group and a dominator in their group. † = p-value < 0.1, \* < 0.05, \*\* < 0.01, \*\*\* < 0.001. Dominator in Group: The more negative the response the more likely the student is to feel there is a dominator.

| Parameters                                                                                                                         | Lack of Access               |                                               | Dominator in Group           |                                                    |
|------------------------------------------------------------------------------------------------------------------------------------|------------------------------|-----------------------------------------------|------------------------------|----------------------------------------------------|
|                                                                                                                                    | Relative Variable Importance | Estimate ± Adjusted SE                        | Relative Variable Importance | Estimate ± Adjusted SE                             |
| <b>Intercept</b>                                                                                                                   | NA                           | -2.19 ± 0.423***                              | NA                           | <i>Multiple intercepts</i>                         |
| <b>Term:</b><br>(reference level: Class A)<br>Class B                                                                              | 0.30                         | 0.24 ± 0.399                                  | 0.96                         | -0.76 ± 0.264**                                    |
| <b>Relative Biology Competency:</b>                                                                                                | 0.76                         | -0.38 ± 0.182*                                | 1                            | 0.51 ± 0.125**                                     |
| <b>Gender:</b><br>(reference level: Male)<br>Female                                                                                | 0.48                         | 0.50 ± 0.467                                  | 0.32                         | -0.13 ± 0.293                                      |
| <b>Race/Ethnicity/Nationality:</b><br>(reference level: White American)<br>Asian American<br>Underserved American<br>International | 0.19                         | 0.61 ± 0.444<br>0.76 ± 0.730<br>-0.41 ± 1.116 | 0.97                         | -0.52 ± 0.288 †<br>0.35 ± 0.523<br>-1.48 ± 0.499** |
| <b>Friend:</b><br>(reference level: No friend in group)<br>Friend in group                                                         | 0.31                         | -0.15 ± 0.500                                 | 0.39                         | 0.24 ± 0.308                                       |
| <b>Race/Ethnicity/Nationality x Friend:</b><br>(reference level: White American and No friend in group)<br>Asian American x Friend | 0.01                         | -0.34 ± 0.928                                 | 0.03                         | 0.58 ± 0.580                                       |

|                                                                                                                                                                                |      |                               |      |                                                |
|--------------------------------------------------------------------------------------------------------------------------------------------------------------------------------|------|-------------------------------|------|------------------------------------------------|
| Underserved American x Friend<br>International x Friend                                                                                                                        |      | -1.80 ± 1.40<br>-14.5 ± 902.8 |      | -0.12 ± 1.169<br>0.719 ± 0.947                 |
| <b>Gender x Friend:</b><br>(reference level: Male and No friend in group)<br>Female x Friend                                                                                   | 0.05 |                               | 0.04 |                                                |
| <b>Gender x Race/Ethnicity/Nationality</b><br>(reference level: Male and White American)<br>Female x Asian American<br>Female x Underserved American<br>Female x International | NA   | NA                            | 0.03 | 0.314 ± 0.530<br>-0.48 ± 1.081<br>0.97 ± 0.947 |

**D. Study 3 Supplemental Tables and Methods: How comfortable are students with participating in group work and is this comfort any greater than their comfort answering instructor posed questions in front of the whole class?**

1. Survey Items and Reliability

The survey used to address this question is given below. The responses to the questions were a likert scale with 4 possible responses: *Strongly Disagree, Disagree, Agree, or Strongly Agree.*

**Suppl. Table 9.** Survey Comparing Experience with Small and Large Group Work

|                                                                                                                                                                                                                              |                                   |
|------------------------------------------------------------------------------------------------------------------------------------------------------------------------------------------------------------------------------|-----------------------------------|
| <b>Prompt 1:</b> Today you worked in a small group with other students on in-class problems (clicker questions or discussion questions). Please refer to this group when you answer the following questions.                 |                                   |
| <b>Peer Discussion Questions:</b>                                                                                                                                                                                            | <b>Factor from Original Paper</b> |
| <i>I feel like I belong in my group.</i>                                                                                                                                                                                     | Comfort being oneself in group    |
| <i>I feel like it's okay to make mistakes in front of others in my group.</i>                                                                                                                                                | Comfort being oneself in group    |
| <i>I feel like it's okay to ask 'dumb' questions in front of my group.</i>                                                                                                                                                   | Comfort being oneself in group    |
| <i>I feel comfortable offering my own ideas in my group.</i>                                                                                                                                                                 | Comfort being oneself in group    |
| <i>I feel different from other students in my group.</i>                                                                                                                                                                     | Social Comparison Concern         |
| <i>I often feel intimidated to participate in my group.</i>                                                                                                                                                                  | Social Comparison Concern         |
| <i>I worry about being wrong when working in my group.</i>                                                                                                                                                                   | Social Comparison Concern         |
| <i>I have generally understood the material as well as the other people in my group.</i>                                                                                                                                     | Social Comparison Concern         |
| <i>I often leave class feeling like I'm not as smart as the other students in my group</i>                                                                                                                                   | Social Comparison Concern         |
| <i>I often leave the class feeling like I'm the only one in my group who doesn't understand the material.</i>                                                                                                                | Social Comparison Concern         |
| <b>Prompt 2:</b> At times you were also asked/encourage by the instructor to offer ideas, ask questions or give answers in front of the whole class. Please refer to this experience when answering the following questions. |                                   |
| <b>Large Group Questions:</b>                                                                                                                                                                                                |                                   |
| <i>I feel like I belong in this class</i>                                                                                                                                                                                    | Comfort being oneself in group    |
| <i>I feel like it's okay to make mistakes in front of the whole class</i>                                                                                                                                                    | Comfort being oneself in group    |

|                                                                                                |                                |
|------------------------------------------------------------------------------------------------|--------------------------------|
| <i>I feel like it's okay to ask 'dumb' questions in front of the whole class.</i>              | Comfort being oneself in group |
| <i>I feel comfortable offering my own ideas in front of the whole class.</i>                   | Comfort being oneself in group |
| <i>I feel different from the other students in this class.</i>                                 | Social Comparison Concern      |
| <i>I often feel intimidated to talk in front of the whole class.</i>                           | Social Comparison Concern      |
| <i>I worry about being wrong in front of the whole class.</i>                                  | Social Comparison Concern      |
| <i>I have generally understood the materials we well as other people in this class</i>         | Social Comparison Concern      |
| <i>I often leave the class feeling like I am not as smart as other students in the class.</i>  | Social Comparison Concern      |
| <i>I often leave class feeling like I am the only one who doesn't understand the material.</i> | Social Comparison Concern      |

*Reliability Analyses for Study 3:*

*Differential Item Functioning (DIF) Analyses for Study 3:*

Researchers, specifically measurement specialists, are concerned with the fairness of the scales, and in particular the possibility that developed scales may be biased against male or female groups. For example, equal response levels of an item are expected for examinees who are matched in their observed total scores which reflect the trait being measured by the scale. In other words, the probability of answering an item correctly or of attaining a particular response level is modeled as a function of an individual's ability or latent trait. Unequal item correct response rates or item response levels between score-matched males and females indicates the potentially biased items that may favor males or females. Differential items functioning (DIF) is developed to detect scale item which function differently between groups of examinees matched in their scores measured by scales. An item showing differential item correct response rates or levels between score-matched males and females is identified as DIF items, especially referred to as gender DIF items as males and females are matched.

An item identified with DIF may be a *biased* item, but it is not necessarily the case. As Zumbo (1999) pointed out, biased items refer to the condition where examinees respond to scale items differently because they are unrelated to traits or constructs the scale is developed to measure. Thus, DIF is required, but not sufficient to claim that an item is biased, until the DIF for the item is proven to be unrelated to what the scale is developed to measure (Zumbo, 1999). If DIF items are proven to be biased after a substantial investigation following the identification of DIF items, scale scores should be adjusted to correct for the resulting DIF effect in the scale scores.

Concern about DIF items has led measurement professionals to develop various DIF detecting methods for investigating such occurrences. DIF analyses are typically conducted at the individual item level. It is assumed that the absence of DIF items will lead to an unbiased scale.

Methods:



The simultaneous Item Bias Test (SIBTest), developed by (Shealy and Stout, 1993a, 1993b), is a statistical method to detect items with DIF implemented by a computer software program called DIFPACK. In this study, SIBTest was selected based on the following reasons. The SIBTest DIF method was selected in my DIF study is based on the following reasons. First, the SIBTest has been found to be more effective in detecting DIF than the Mantel-Haenszel and logistic regression DIF methods (Bolt and Stout, 1996; Jiang and Stout, 1998). Second, the SIBTest uses non-parametric approach to design its DIF detection model, which is different from those DIF methods developed by the parametric approach. The parameter-oriented DIF method requires stronger assumptions that a dataset may fail to meet its assumption. Third, after items identified as DIF, they can be grouped as a bundle to examine the potential sources that contribute to the DIF effect. Fourth, instead of using observed test score, the SIBTest runs a regression to estimate the true score used to match students on ability, which results in an improved estimation of ability level where the examinees should stay. Because the collected data includes both dichotomously and polytomously scored items, the Poly-SIBTest option in the DIFPACK v1.7 software application was selected to perform gender DIF item analysis. To identify items as DIF status, a nominal  $\alpha$  equal to .01, which is commonly used, was selected in the hypothesis testing to control Type I error rate. In such a circumstance, 1% of the items would be falsely identified as DIF when they did not truly show DIF. When items identified as DIF, the guidelines developed by Roussos and Stout (1996) can be used to evaluate magnitude of the DIF as negligible, moderate or large effect. Student records with missing data were eliminated from the data to meet the requirement of Poly-SIBTest DIF method. The number of students involved in the gender DIF analysis was smaller than the collected ones.

#### Results and Conclusions:

For other 10 items administered to the participants in peer discussions, there were 279 males and 388 females involved in the DIF analysis. Three items including, Q1, Q2, and SG4, were flagged with DIF ( $B = .116, -.239, \text{ and } .117, p < .01$ ). Items Q1 (*I feel comfortable offering my own ideas in my group*) and SG4 (*I often leave class feeling like I'm not as smart as the other students in my group*) favored males whereas item Q2 (*I feel different from other students in my group*) favored females. For the identical 10 items administered to the participants in large class discussion, there were 275 males and 391 females involved in the DIF analysis. The DIF analysis showed there is only one item Q4 (*I feel different from the other students in this class.*) identified as DIF favoring females ( $B = -.225, p < .01$ ). All five identified gender DIF items were classified as large magnitude of DIF effects as the estimated betas were larger than .08.

Four out of 31 items were identified as DIF status which indicate unequal response levels between males and females matched in their observed survey scores. Consistent with the previous studies, the finding supports that the gender DIF items do occur in a survey. However, as pointed out, they do not count as biased items unless the source of DIF contributing to unequal possibilities can be proved irrelevant to the ability or trait a scale developed to measure. The identified gender DIF items may place a threat to the validity of the scale. Thus, further comprehensive investigation aiming at flagged DIF items is suggested to ensure the validity of the items before those items are allowed to use to reflect what the scale is designed to measure.

## 2. Model Selection Results for Social Comparison Concern and Comfort Being Yourself factors

**Suppl. Table 10.** 95% confidence set of best ranked models (summed  $\omega > 0.95$ ) examining the effect of student characteristics on Factor 1: Comfort Being Oneself. Models also have a random effect (1|Stu.ID)

| Rank | Model                                                                             | AICc   | $\Delta_i$ | $\omega_i$ |
|------|-----------------------------------------------------------------------------------|--------|------------|------------|
| 1    | Gender + RBC + Context + Gender x Context                                         | 5428.8 | 0.0        | 0.36       |
| 2    | Gender + RBC + Context + Ethn + Gender x Ethn + Gender x Context + Ethn x Context | 5429.1 | 0.31       | 0.31       |
| 3    | Gender + RBC + Context + Ethn + Gender x Context + Ethn x Context                 | 5429.9 | 1.04       | 0.21       |
| 4    | Gender + RBC + Context + Ethn + Gender x Ethn + Gender x Context                  | 5432.2 | 3.36       | 0.07       |

**Suppl. Table 11.** 95% confidence set of best ranked models (summed  $\omega > 0.95$ ) examining the effect of student characteristics on Factor 2: Social Comparison Concern. Models also have a random effect (1|Stu.ID)

| Rank | Model                                                                             | AICc   | $\Delta_i$ | $\omega_i$ |
|------|-----------------------------------------------------------------------------------|--------|------------|------------|
| 1    | Gender + Context + RBC + Ethn + Gender x Context + Ethn x Context + Gender x Ethn | 5925.2 | 0.0        | 0.50       |
| 2    | Gender + Context + RBC + Gender x Context                                         | 5926.6 | 1.44       | 0.24       |
| 3    | Gender + Context + RBC + Ethn + Gender x Context + Ethn x Context                 | 5927.7 | 2.52       | 0.14       |
| 4    | Gender + Context + RBC + Ethn + Gender x Context + Gender x Ethn                  | 5930.1 | 4.93       | 0.04       |
| 5    | Gender + Context + RBC + Ethn + Ethn x Context + Gender x Ethn                    | 5930.9 | 5.69       | 0.03       |

**Suppl. Table 12.** Students report more positively on both factors in peer discussions relative whole class discussions, especially women. Model averaged coefficients for Comfort and Social Comparison Concern. Models also have a random effect (1|Stu.ID). † = p-value < 0.1, \* < 0.05, \*\* < 0.01, \*\*\* < 0.001.

| Parameter                                                                                                                                        | Factor 1:<br>Comfort Being Oneself |                                                 | Factor 2:<br>Social Comparison Concern |                                                  |
|--------------------------------------------------------------------------------------------------------------------------------------------------|------------------------------------|-------------------------------------------------|----------------------------------------|--------------------------------------------------|
|                                                                                                                                                  | Relative Variable Importance       | Model Averaged Coefficients                     | Relative Variable Importance           | Model Averaged Coefficients                      |
| <b>Intercept</b>                                                                                                                                 | NA                                 | 12.8 ± 0.194***                                 | NA                                     | 17.1 ± 0.256***                                  |
| <b>Relative Biology Competency:</b>                                                                                                              | 1                                  | 0.51 ± 0.068***                                 | 1                                      | 1.27 ± 0.099***                                  |
| <b>Gender:</b><br>(reference level: Male)<br>Female                                                                                              | 1                                  | -0.003 ± 0.254                                  | 0.98                                   | 0.018 ± 0.298                                    |
| <b>Ethn:</b><br>(reference level: White American)<br>Asian American<br>Underserved American<br>International                                     | 0.64                               | -0.13 ± 0.313<br>0.11 ± 0.379<br>-0.08 ± 0.542  | 0.74                                   | -0.08 ± 0.347<br>-0.22 ± 0.574<br>-1.84 ± 0.751* |
| <b>Gender x Ethn:</b><br>(reference level: White and Male)<br>Female x Asian American<br>Female x Underserved American<br>Female x International | 0.38                               | -0.70 ± 0.293*<br>0.03 ± 0.490<br>-0.44 ± 0.609 | 0.57                                   | -0.44 ± 0.424<br>0.54 ± 0.710<br>1.47 ± 0.886 †  |
| <b>Participation Context</b>                                                                                                                     | 1                                  |                                                 | 1                                      |                                                  |

|                                                                                                                                                                                                   |      |                                                 |      |                                                  |
|---------------------------------------------------------------------------------------------------------------------------------------------------------------------------------------------------|------|-------------------------------------------------|------|--------------------------------------------------|
| <i>(reference level: Peer Discussions)</i><br>Whole Class                                                                                                                                         |      | -2.30 ± 0.245***                                |      | -2.44 ± 0.270***                                 |
| <b>Gender x Participation Context:</b><br><i>(reference level: Male and Peer Discussions)</i><br>Female*Whole Class                                                                               | 1    | -1.11 ± 0.218***                                | 0.93 | -0.68 ± 0.225**                                  |
| <b>Ethn x Participation Context:</b><br><i>(reference level: White and Peer Discussions)</i><br>Asian American x Whole Class<br>Underserved American x Whole Class<br>International x Whole Class | 0.52 | 0.43 ± 0.231†<br>0.16 ± 0.485<br>1.44 ± 0.485** | 0.68 | 0.44 ± 0.239 †<br>0.05 ± 0.502<br>1.62 ± 0.502** |

## E. Supplemental Analyses for Study 4: Value of Peer discussion

### DIF Analyses Results:

Methods were the same as those applied to the survey in Study 3. It's important to note that for this data set, the number of students dramatically decreased because of the missing data elimination procedure.

The gender DIF analysis is summarized as follows. For 11 items only administered to the participants in peer discussion, there were 112 males and 159 females involved in the DIF analysis. As a result, only one item, Q22 (*After discussing a clicker question in my group, I am more likely to answer it correctly than if I had worked by myself*), was flagged with DIF ( $B = -.233, p < .01$ ). The item favored females indicating higher response level than that of males.

### Factor Analysis:

**Suppl. Table 13.** Factor Loadings for Groupwork survey. An asterisk (\*) after a loading indicates that the question belongs to that factor.

| Questions:                                                                                     | Factor 1 Loadings:<br>Group Function | Factor 2 Loadings:<br>Comfort and Confidence<br>with Contribution |
|------------------------------------------------------------------------------------------------|--------------------------------------|-------------------------------------------------------------------|
| <i>My group worked well together.</i>                                                          | 0.980*                               | 0.021                                                             |
| <i>My group members made significant contributions of knowledge and/or ideas to the group.</i> | 0.977*                               | -.001                                                             |
| <i>I made significant contributions of knowledge and/or ideas to my group.</i>                 | 0.977*                               | 0.024                                                             |
| <i>There was one (or more) person in my group who dominated most of the discussion.</i>        | 0.976*                               | 0.021                                                             |
| <i>There was one (or more) person in my group who dominated most of the discussion.</i>        | 0.971*                               | 0.015                                                             |
| <i>I feel like I can be myself in my group.</i>                                                | -0.065                               | 0.841*                                                            |
| <i>I feel like I belong in my group.</i>                                                       | -0.065                               | 0.821*                                                            |
| <i>I understand the material as well as other students in my group.</i>                        | -0.095                               | .790*                                                             |
| <i>I feel comfortable offering my own ideas in my group.</i>                                   | 0.225                                | 0.778*                                                            |
| <i>I often feel intimidated to participate in my group.</i>                                    | 0.042                                | 0.775*                                                            |
| <i>I worry about being wrong when working in my group.</i>                                     | -0.020                               | .741*                                                             |
| <i>I feel different from other students in my group.</i>                                       | 0.097                                | 0.684*                                                            |

In addition, we asked students 5 questions related to the value they perceived in peer discussions. These questions were used as a third factor that was a response variable in our analysis:

- *Explaining the material to my group improved my understanding of it. If you did not get the opportunity to explain material, please leave blank.*
- *A group member explaining the material to me improved my understanding of it. If you did not get the opportunity to have material explained to you, please leave blank.*
- *After discussing a clicker question in my group, I am more likely to answer it correctly than if I had worked by myself.*
- *Listening to a lecture helps me understand a topic better than discussing it with other students in a group.*
- *Discussing a topic with other students in a group helps me understand a topic better than listening to a lecture.*

Finally we asked 2 questions intended to control for how familiar a student was with their groupmates. We ultimately chose to use the friend outside of class question as our control and we collapsed the Likert scale question to a binary with the No Friend condition including Strongly Disagree and Disagree and the Friend condition including Strongly Agree and Agree. The original questions were:

- *I am friends outside of class with at least one of the students in my group.*
- *I did not know the other students in my group before taking this class.*

#### *Model Selection for Factor 1: Group Function and Factor 2: Comfort and Confidence with Group work*

Seven potential variables were initially considered to contribute to responses on the survey questions: 1) a student's overall performance in the course (BI.GPA); 2) student gender identity (a factor with two levels; Stu.Gender); 3) student race/ethnicity/nationality (a factor with 4 levels; Ethn); 4) an interaction between student gender identity and race/ethnicity/nationality (Stu.Gender\*Ethn); 5) whether not a student had a friend in the group (a factor with two levels; Friend); 6) an interaction between gender identity and friend (Stu.Gender\*Friend); and 7) an interaction between race/ethnicity/nationality and friend (Ethn\*Friend). Only students with a complete set of these variables were included in this analysis.

Combinations of these 7 variables produced a total of 72 potential models to describe our data. The total number of models tested was substantially lower than our number of observations (n=360 students), which justified fully exploring this set of models. Thus, we systematically explored the possible models for our data and ultimately chose the model that best fits the data according to the model-selection statistics. We also calculated the model averaged regression coefficients for the fixed effects in our model. Our initial full model was as follows:

Factor = BI.GPA + Stu.Gender + Ethn + Stu.Gender\*Ethn + Friend + Stu.Gender\*Friend + Ethn\*Friend

*Factor 1: Group Function.* Model selection identified 9 models that had the strongest support ( $\Delta_i < 4$ ) for predicting student responses on this factor. The top three models had the majority of support (summed  $\omega = 0.53$ ; Supp. Table 11). The top two models had almost equal support and differed only in whether

or not a the dichotomous variable indicating whether a student had a friend in the group was present. The best model included Friend as well as Exam Performance, Term, Race/Ethnicity/Nationality and explained 14% of the variation in student responses. This low  $R^2$  along with the instability in terms present in the top model indicates our explanatory variables capture some of the variation in this factor, but are not sufficient for capturing the main causes of variation.

Specifically, exam performance, the iteration of the course, and Race/Ethnicity/Nationality all significantly predicted student responses on Factor 1 (Supp. Table 12). As student exam performance increased so did their sense that their group functioned well ( $\beta = 0.135 \pm 0.190$ ). Relative to White American students Asian and International students felt their groups functioned less well ( $\beta = -0.371 \pm 0.161$  and  $\beta = -0.561 \pm 0.278$  respectively).

**Suppl. Table 14.** 95% confidence set of best ranked models (summed  $\omega_i > 0.95$ ) examining the effect of student characteristics on Factor 1: Group Function.

| Rank | Model                                                                | AICc   | $\Delta_i$ | $\omega_i$ |
|------|----------------------------------------------------------------------|--------|------------|------------|
| 1    | Term + BI.GPA + Friend + Ethn                                        | 695.44 | 0          | 0.21       |
| 2    | Term + BI.GPA + Ethn                                                 | 695.67 | 0.22       | 0.19       |
| 3    | Term + BI.GPA + Gender + Ethn                                        | 696.39 | 0.94       | 0.13       |
| 4    | Term + BI.GPA + Friend + Gender + Ethn                               | 696.47 | 1.03       | 0.12       |
| 5    | Term + BI.GPA + Friend + Gender + Ethn+ Friend*Gender                | 696.90 | 1.46       | 0.10       |
| 6    | Term + BI.GPA                                                        | 698.57 | 3.13       | 0.04       |
| 7    | Term + BI.GPA + Friend                                               | 699.14 | 3.70       | 0.03       |
| 8    | Term + BI.GPA + Ethn + Friend + Friend*Ethn                          | 699.34 | 3.90       | 0.03       |
| 9    | Term + BI.GPA + Gender                                               | 699.42 | 3.98       | 0.03       |
| 10   | Term + BI.GPA + Friend + Gender                                      | 700.10 | 4.65       | 0.02       |
| 11   | Term + BI.GPA + Friend + Gender +Ethn + Friend*Ethn                  | 700.43 | 4.99       | 0.02       |
| 12   | Term + BI.GPA + Friend +Gender + Friend*Gender                       | 700.82 | 5.38       | 0.01       |
| 13   | Term + BI.GPA + Friend +Gender + Ethn + Gender*Ethn                  | 701.02 | 5.58       | 0.01       |
| 14   | Term + BI.GPA + Friend + Gender + Ethn + Gender*Ethn                 | 701.23 | 5.82       | 0.01       |
| 15   | Term + BI.GPA + Friend + Gender + Ethn +Friend*Gender + Friend*Ethn  | 701.26 | 5.82       | 0.01       |
| 16   | Term + BI.GPA + Friend + Gender + Ethn + Friend*Gender + Gender*Ethn | 701.89 | 6.45       | 0.01       |
| 17   | BI.GPA +Friend + Ethn                                                | 702.59 | 7.14       | 0.01       |
| 18   | BI.GPA + Friend +Gender + Ethn                                       | 703.76 | 8.32       | 0.00       |
| 19   | BI.GPA + Ethn                                                        | 704.18 | 8.74       | 0.00       |
| 20   | Term + BI.GPA + Gender + Ethn + Friend*Gender                        | 704.30 | 8.86       | 0.00       |

**Suppl. Table 15.** Asian American and International students report more negatively on both factors whereas performance in the course and having a friend in the group leads to more positive responses. Relative Variable Importance and Model averaged coefficients for Group Function and Comfort and Confidence Factors for peer discussions. † = p-value < 0.1, \* <0.05, \*\*<0.01, \*\*\*<0.001.

| Parameter | Factor 1: Group Function     |                             | Factor 2: Comfort and Confidence |                             |
|-----------|------------------------------|-----------------------------|----------------------------------|-----------------------------|
|           | Relative Variable Importance | Model Averaged Coefficients | Relative Variable Importance     | Model Averaged Coefficients |
| Intercept | NA                           | 0.24 ± 0.180                | NA                               | 0.03 ± 0.172                |
| BI.GPA    | 1                            | 0.24 ± 0.064***             | 1                                | 0.23 ± 0.063***             |
| Friend:   | 0.60                         |                             | 0.99                             |                             |

|                                                                                                                                              |      |                                                   |      |                                                     |
|----------------------------------------------------------------------------------------------------------------------------------------------|------|---------------------------------------------------|------|-----------------------------------------------------|
| (reference level: no friend in group)<br>Friend in Group                                                                                     |      | 0.14 ± 0.190                                      |      | 0.44 ± 0.156**                                      |
| Gender:<br>(reference level: Male)<br>Female                                                                                                 | 0.49 | -0.21 ± 0.199                                     | 0.80 | -0.24 ± 0.159                                       |
| Term:<br>(reference level: larger class)<br>Smaller Class                                                                                    | 0.98 | -0.43 ± 0.136**                                   | 0.38 | -0.14 ± 0.134                                       |
| Ethn:<br>(reference level: White American)<br>Asian American<br>Underserved American<br>International                                        | 0.86 | -0.37 ± 0.161*<br>-0.18 ± 0.301<br>-0.56 ± 0.278* | 0.99 | -0.41 ± 0.141**<br>-0.13 ± 0.274<br>-0.80 ± 0.271** |
| Gender x Ethn:<br>(reference level: White American and Male)<br>Female*Asian American<br>Female*Underserved American<br>Female*International | 0.03 | 0.28 ± 0.261<br>-0.13 ± 0.564<br>0.38 ± 0.527     | 0.04 | 0.13 ± 0.256<br>0.12 ± 0.553<br>0.37 ± 0.519        |
| Gender x Friend:<br>(reference level: Male and no Friend)<br>Female*Friend                                                                   | 0.14 | 0.37 ± 0.271                                      | 0.20 | -0.04 ± 0.266                                       |
| Ethn x Friend:<br>(reference level: White and no Friend)<br>Asian American*Friend<br>Underserved American*Friend<br>International*Friend     | 0.06 | 0.33 ± 0.292<br>0.59 ± 0.565<br>-0.17 ± 0.513     | 0.05 | -0.06 ± 0.288<br>0.35 ± 0.557<br>-0.23 ± 0.508      |

*Factor 2 – Comfort and Confidence with Contributions to Group.* Model selection identified 6 models that predicted student responses on this factor. The top 2 models had the majority of the support (summed  $\omega = 0.53$ ; Supp. Table 13). The top model is 1.65 times more likely to be the best model than the second best model. The best model includes Friend, Race/Ethnicity/Nationality, Exam Performance and Gender. The second best model includes the additional variable Term. The best model has a low  $R^2$  (17%) indicating that our explanatory variables were not able to capture the majority of the variation in this factor.

Across all the potential models, Exam Performance, Friend, and Race/Ethnicity/Nationality were the only variables that significantly explained student responses on this factor (Supp. Table 12). Both having a friend in the group and performing better on exams caused students to answer more positively on this factor. Asian American and international students were less likely to respond as positively on this factor as White American students.

**Suppl. Table 16.** 95% confidence set of best ranked models (summed  $\omega > 0.95$ ) examining the effect of student characteristics on Factor 2: *Comfort and Confidence with Contributions to Group.*

| Rank | Model                                                  | AICc   | $\Delta_i$ | $\omega_i$ |
|------|--------------------------------------------------------|--------|------------|------------|
| 1    | Friend + Ethn + BI.GPA + Gender                        | 686.78 | 0          | 0.33       |
| 2    | Friend + Ethn + BI.GPA + Gender + Term                 | 687.76 | 0.98       | 0.20       |
| 3    | Friend + Ethn + BI.GPA                                 | 688.89 | 2.10       | 0.12       |
| 4    | Friend + Ethn + BI.GPA + Gender + Friend*Gender        | 688.91 | 2.12       | 0.12       |
| 5    | Friend + Ethn + BI.GPA + Gender + Term + Friend*Gender | 689.90 | 3.12       | 0.07       |
| 6    | Friend + Ethn + BI.GPA + Term                          | 690.01 | 3.23       | 0.07       |

**Suppl. Table 17.** Value of Group work. 95% confidence set of best ranked models (summed  $\omega > 0.95$ ) examining the effect of student characteristics on Factor 3: Value of Group Work. Function = Response on Group Function factor, Comfort = Response on the Comfort and Confidence with Participation factor.

| Rank | Model                                                                      | AICc    | $\Delta_i$ | $\omega_i$ |
|------|----------------------------------------------------------------------------|---------|------------|------------|
| 1    | Function + Comfort + Friend + Gender + Term + RBC + Friend x Gender        | 1074.72 | 0          | 0.28       |
| 2    | Comfort + Friend + Gender + Term + RBC + Friend x Gender                   | 1075.56 | 0.84       | 0.19       |
| 3    | Function + Comfort + Friend + Term + RBC                                   | 1077.13 | 2.41       | 0.08       |
| 4    | Function + Comfort + Friend + Gender + Term + Ethn + RBC + Friend x Gender | 1077.38 | 2.66       | 0.07       |
| 5    | Function + Friend + Term + RBC                                             | 1077.48 | 2.75       | 0.07       |
| 6    | Function + Friend + Gender + Term + Ethn + RBC + Friend x Gender           | 1078.11 | 3.39       | 0.05       |
| 7    | Function + Comfort + Friend + Gender + RBC + Gender x Friend               | 1078.40 | 3.68       | 0.04       |
| 8    | Function + Comfort + Friend + Gender + Term + RBC                          | 1079.07 | 4.35       | 0.03       |
| 9    | Function + Friend + Gender + Term + RBC                                    | 1079.23 | 4.51       | 0.03       |
| 10   | Function + Friend + Gender + RBC + Gender x Friend                         | 1079.63 | 4.91       | 0.02       |
| 11   | Function + Comfort + Friend + Term + RBC + Ethn                            | 1079.90 | 5.17       | 0.02       |
| 12   | Function + Friend + Term + RBC + Ethn                                      | 1080.25 | 5.53       | 0.02       |
| 13   | Function + Comfort + Friend + RBC                                          | 1081.00 | 6.28       | 0.01       |
| 14   | Function + Comfort + Friend + Gender + Ethn + RBC + Friend x Gender        | 1081.28 | 6.56       | 0.01       |
| 15   | Function + Friend + RBC                                                    | 1081.74 | 7.02       | 0.01       |
| 16   | Function + Comfort + Friend + Gender + Term + RBC + Ethn + Gender x Friend | 1081.75 | 7.03       | 0.01       |
| 17   | Function + Friend + Gender + Term + RBC + Ethn + Gender x Friend           | 1081.86 | 7.14       | 0.01       |

**Suppl. Table 18.** Value of Group Work model averaged coefficients. † = p-value < 0.1, \* < 0.05, \*\* < 0.01, \*\*\* < 0.001.

| Parameter                                                                                                                     | Relative Variable Importance | Model Averaged Coefficients                   | p-value                 |
|-------------------------------------------------------------------------------------------------------------------------------|------------------------------|-----------------------------------------------|-------------------------|
| <b>Intercept</b>                                                                                                              | NA                           | 5.15 ± 1.23                                   | < 0.001***              |
| <b>Factor 1: Group Function</b>                                                                                               | 1                            | 0.51 ± 0.089                                  | < 0.0001***             |
| <b>Factor 2: Comfort and Confidence with Participation</b>                                                                    | 0.59                         | 0.09 ± 0.054                                  | 0.098 <sup>†</sup>      |
| <b>Relative Biology Competency</b>                                                                                            | 0.99                         | -0.50 ± 0.140                                 | 0.0004***               |
| <b>Friend:</b><br>(reference level: no friend in group)<br>Friend in Group                                                    | 0.99                         | 0.32 ± 0.580                                  | 0.578                   |
| <b>Gender:</b><br>(reference level: Male)<br>Female                                                                           | 0.77                         | -1.05 ± 0.579                                 | 0.0684 <sup>†</sup>     |
| <b>Term:</b><br>(reference level: Class B)<br>Class A                                                                         | 0.88                         | 0.71 ± 0.293                                  | 0.015*                  |
| <b>Race/Ethn/Nationality:</b><br>(reference level: White American)<br>Asian American<br>Underserved American<br>International | 0.21                         | -0.31 ± 0.283<br>0.31 ± 0.497<br>0.50 ± 0.552 | 0.282<br>0.889<br>0.365 |
| <b>Gender x Friend:</b><br>(reference level: Male and no Friend)<br>Female*Friend                                             | 0.68                         | 1.42 ± 0.248                                  | 0.014*                  |



Work Cited:

Bolt, D., and Stout, W. (1996). Differential item functioning: Its multidimensional model and resulting SIBtest procedure. *Behaviormetrika* 23, 67–95.

Glaser, B.G., and Strauss, A.L. (2009). *The Discovery of Grounded Theory: Strategies for Qualitative Research* (Transaction Publishers).

Jiang, H., and Stout, W. (1998). Improved Type I Error control and reduced estimation bias for DIF detection using SIBTEST. *J. Educ. Behav. Stat.* 23, 291–322.

Roussos, L., and Stout, W. (1996). A multidimensionality-based DIF analysis paradigm. *Appl. Psychol. Meas.* 20, 355–371.

Shealy, R., and Stout, W.F. (1993a). An item response theory model for test bias. In *Differential Item Functioning*, (Hillsdale, NJ: Erlbaum), pp. 197–239.

Shealy, R., and Stout, W.F. (1993b). A model-based standardization approach that separates true bias/DIF from group differences and detects test bias/DTF as well as item bias/DIF. *Psychometrika* 58, 159–194.

Strauss, A., and Corbin, J.M. (1990). *Basics of Qualitative Research: Grounded Theory Procedures and Techniques* (Sage).

Zumbo, B.D. (1999). *A Handbook on the Theory and Methods of Differential Item Functioning (DIF): Logistic Regression Modeling as a Unitary Framework for Binary and Likert-type (Ordinal) Item Scores* (Ottawa, ON: Directorate of Human Resources Research and Evaluation, Department of National Defense).
